# Supplementary material for: New organically templated chained and layered iodoplumbates
Source: Royal Society of Chemistry journal article supplement (doi:10.1039/c2ce25102g), 2012-01-01

# Supplementary materials

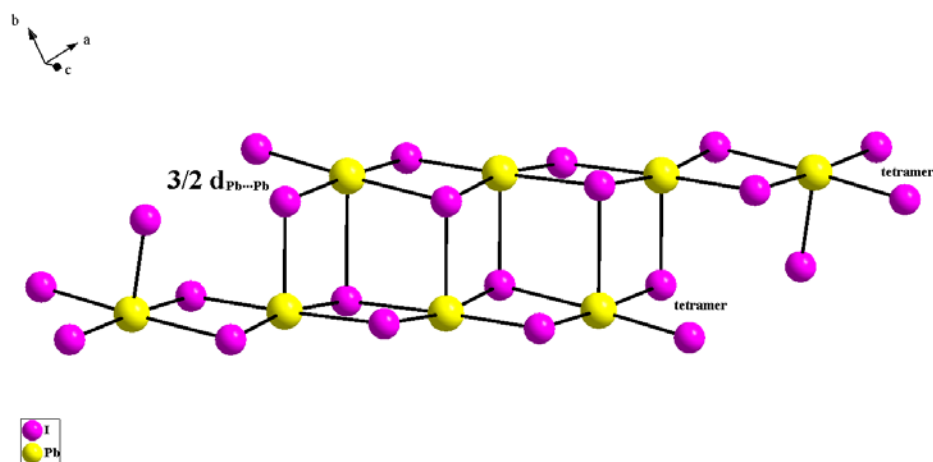

**Fig. S1** The packing pattern of the adjacent tetramers in compound 2.

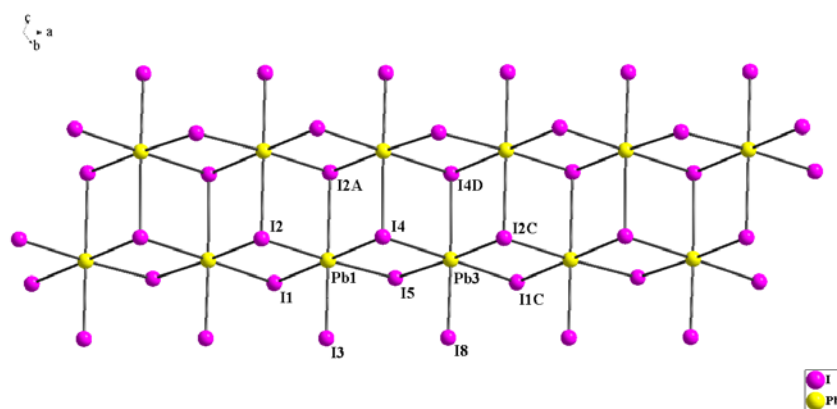

**Fig. S2** The 1-D ribbon in compound 3.

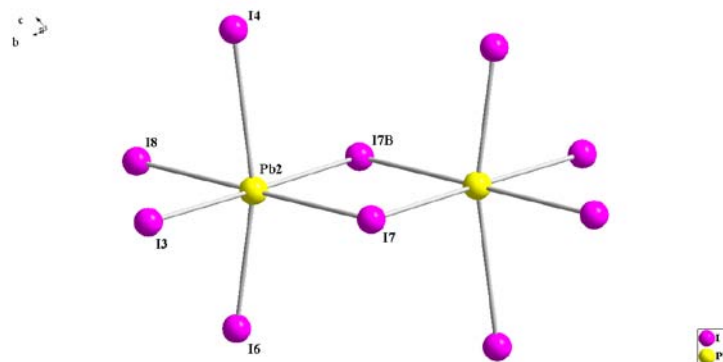

**Fig. S3** The dinuclear cluster bridge in compound 3.

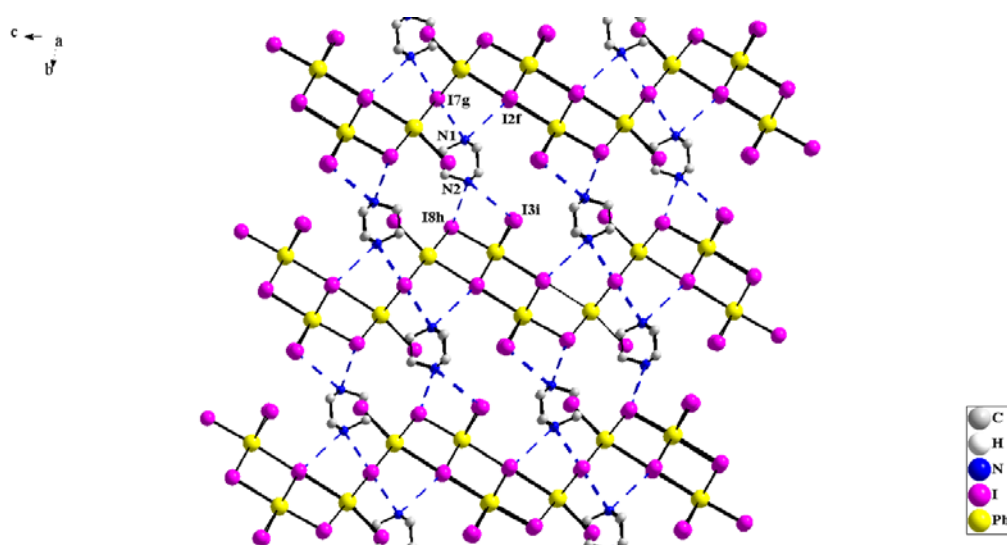

Supplement: c2ce25102g.pdf [file c2ce25102g.pdf]
